# Supplementary material for: Virtual Reality for Upper Extremity Rehabilitation—A Prospective Pilot Study
Source: Healthcare (Basel). 2023 May 21;11(10):1498. doi: 10.3390/healthcare11101498 (PMC10218592; doi:10.3390/healthcare11101498)

Figure S1: Acceptance analysis based on the Unified Theory of Technology Acceptance I (UTAUT I)

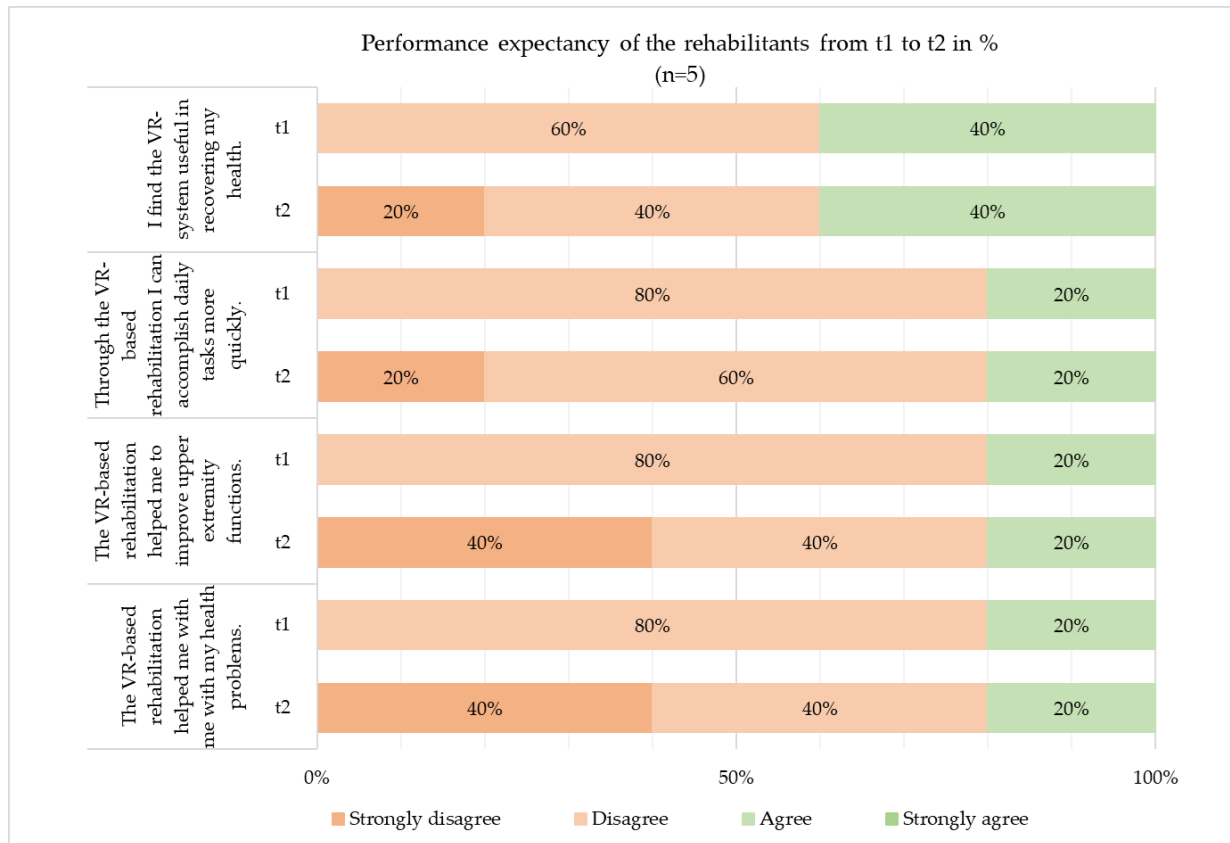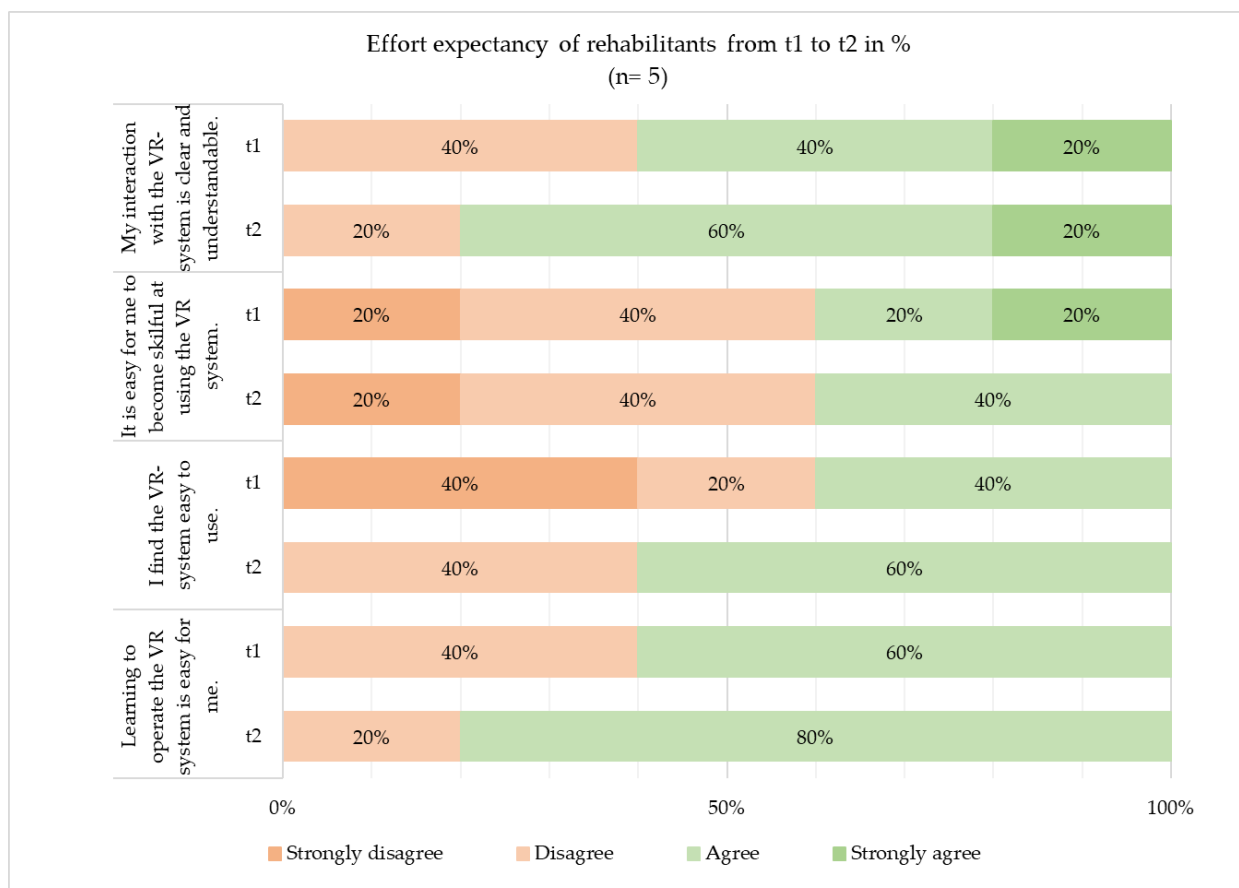

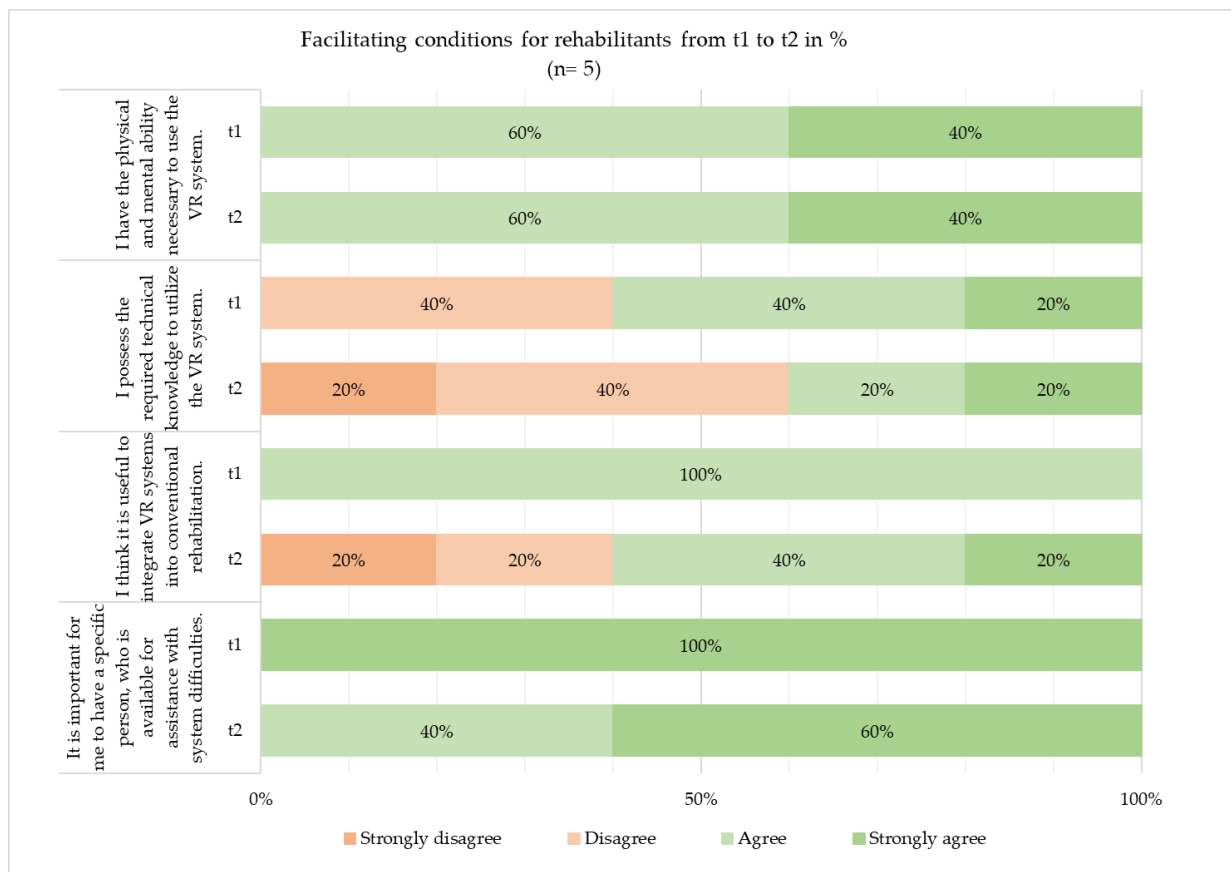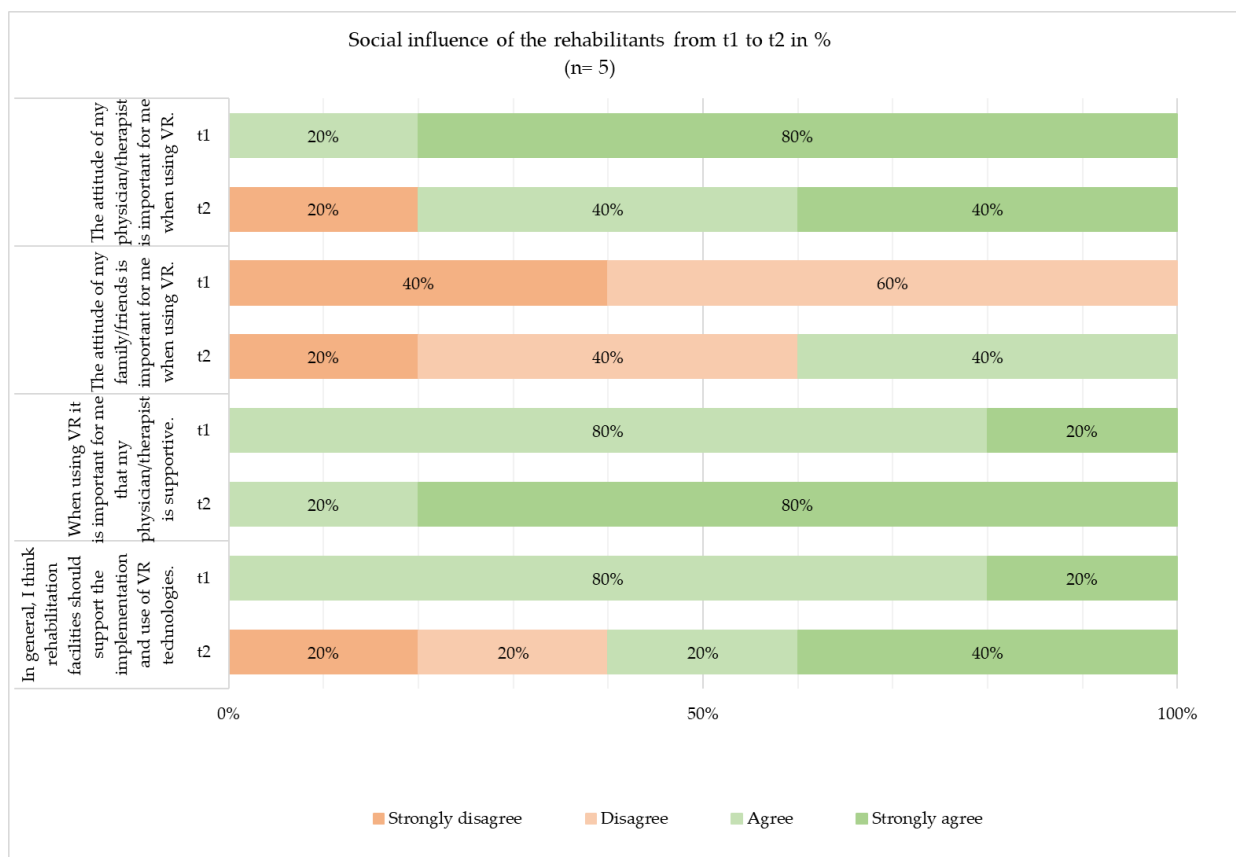

The importance of data protection for rehabilitants from t1 to T2 in % (n= 5)

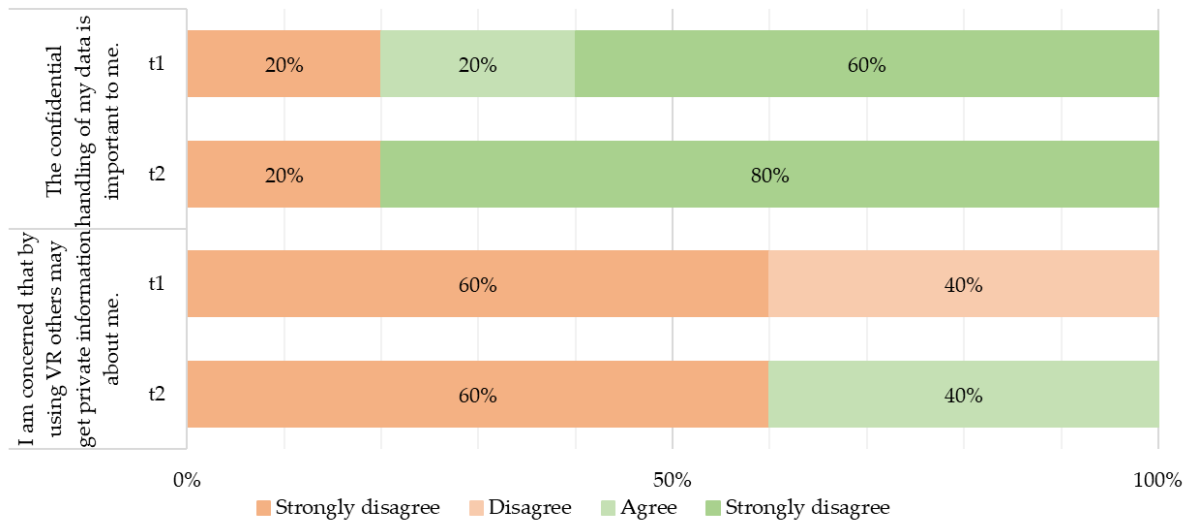

Intention to use of rehabilitants from t1 to t2 in % (n= 5)

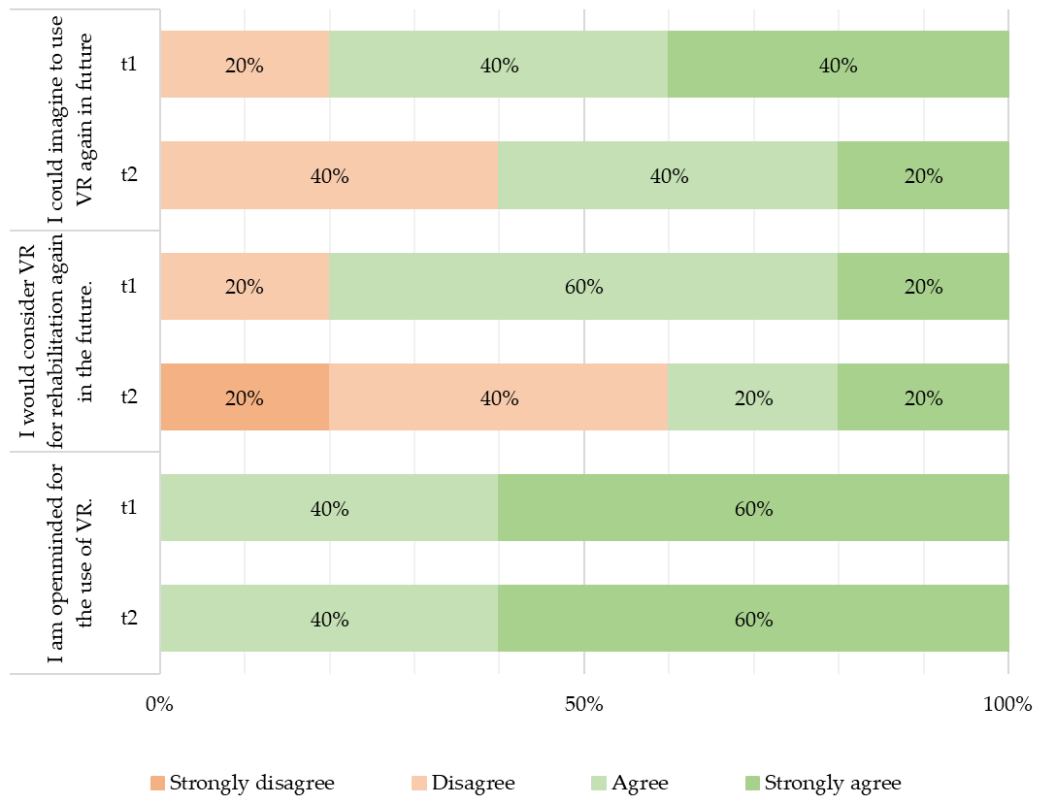

Supplement: Supplementary file 1 [file healthcare-11-01498-s001.zip › healthcare-2341125-supplementary.pdf]
