# Supplementary figures and images for: Virtual Reality for Upper Extremity Rehabilitation—A Prospective Pilot Study
Source: MDPI journal article supplement (doi:10.3390/healthcare11101498), 2023-05-21

Figure S1: Acceptance analysis based on the Unified Theory of Technology Acceptance I (UTAUT I)

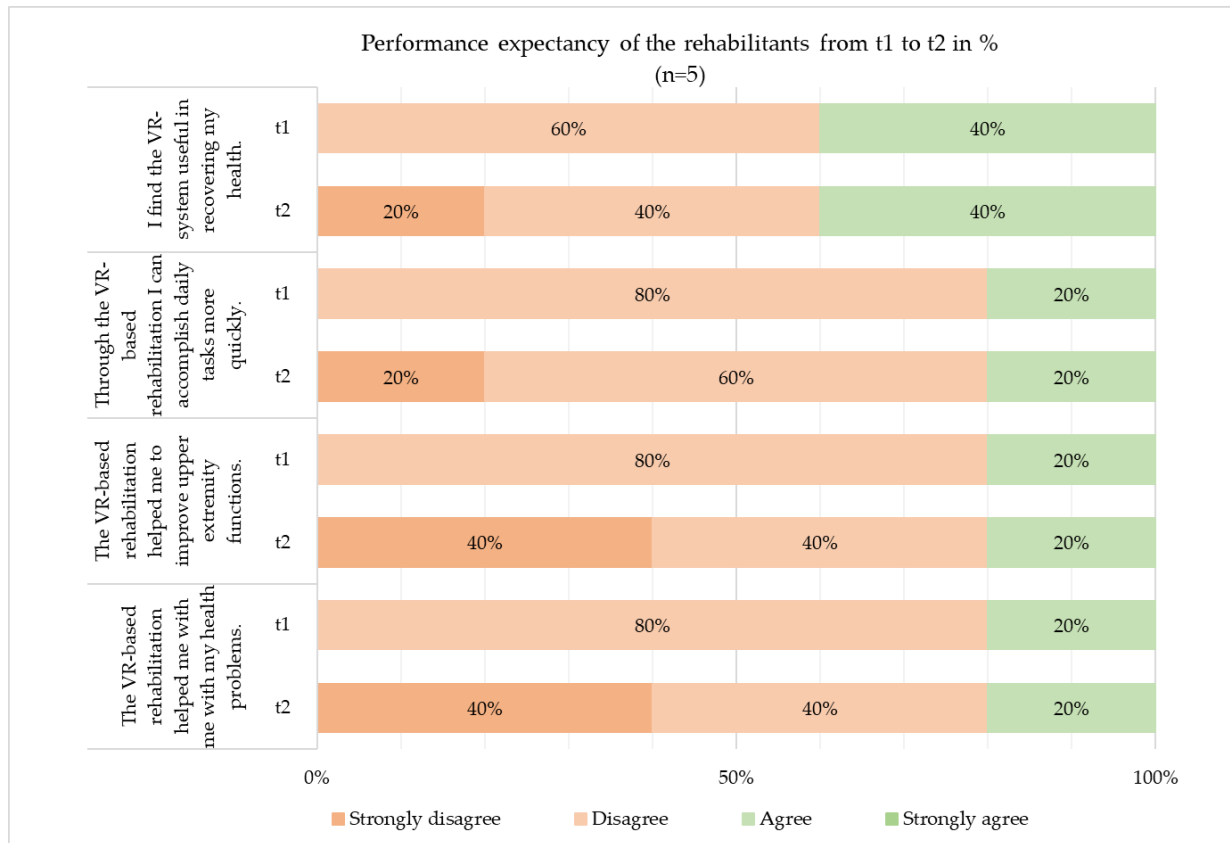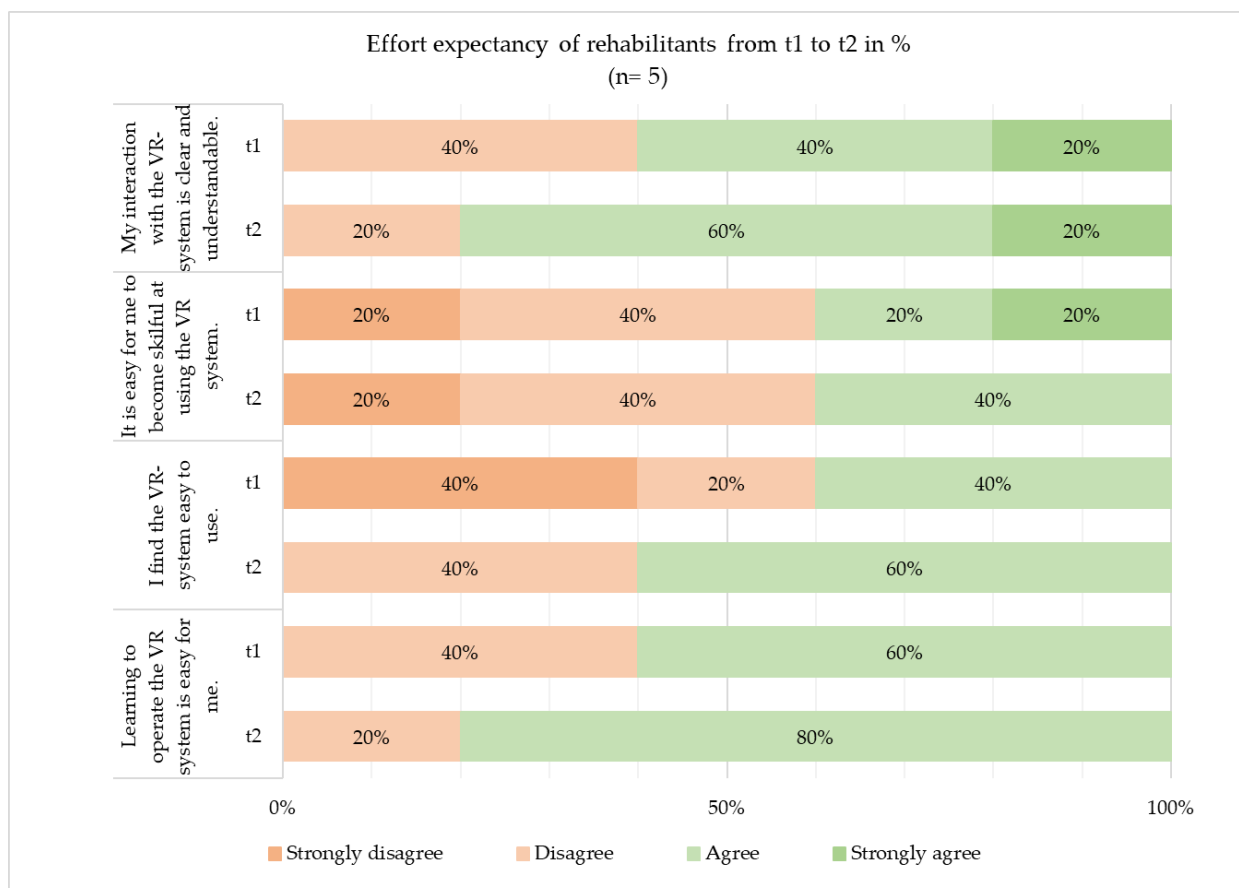

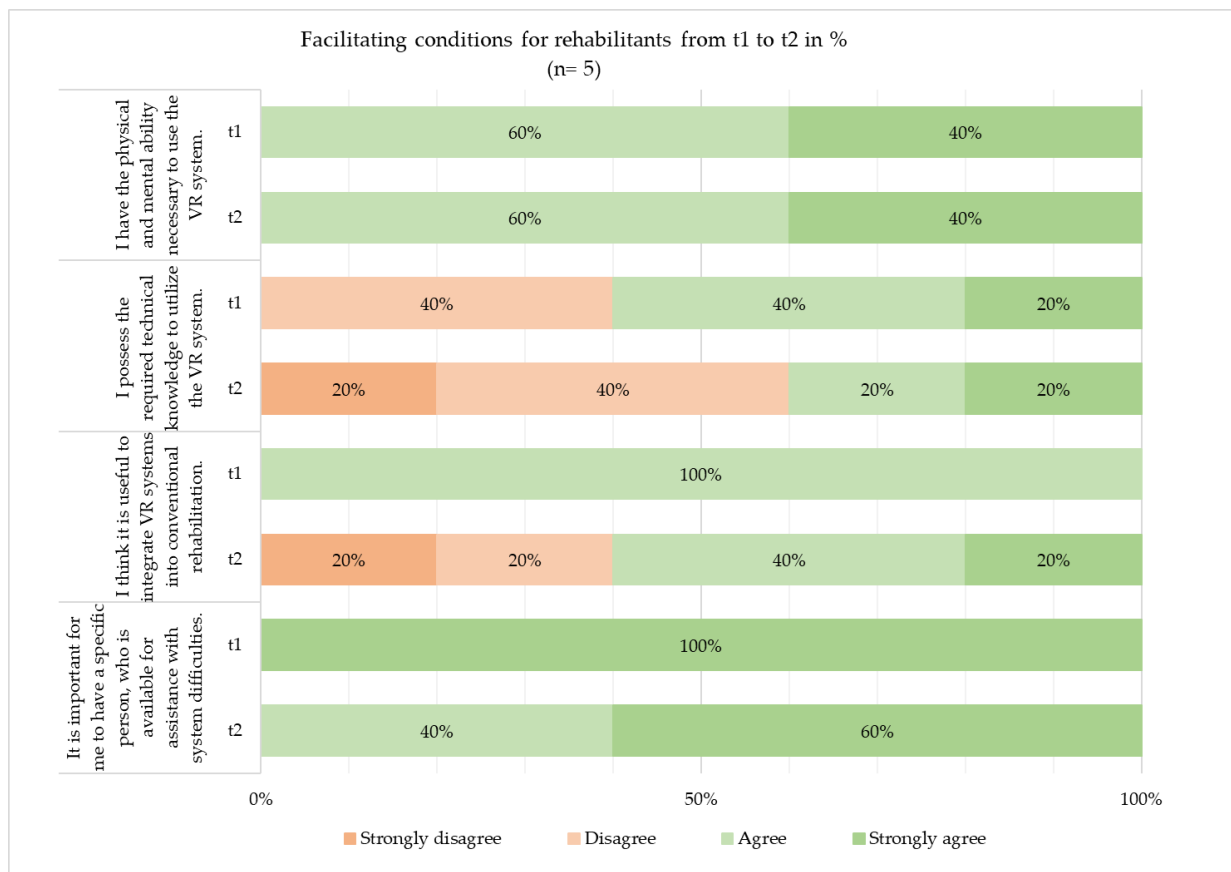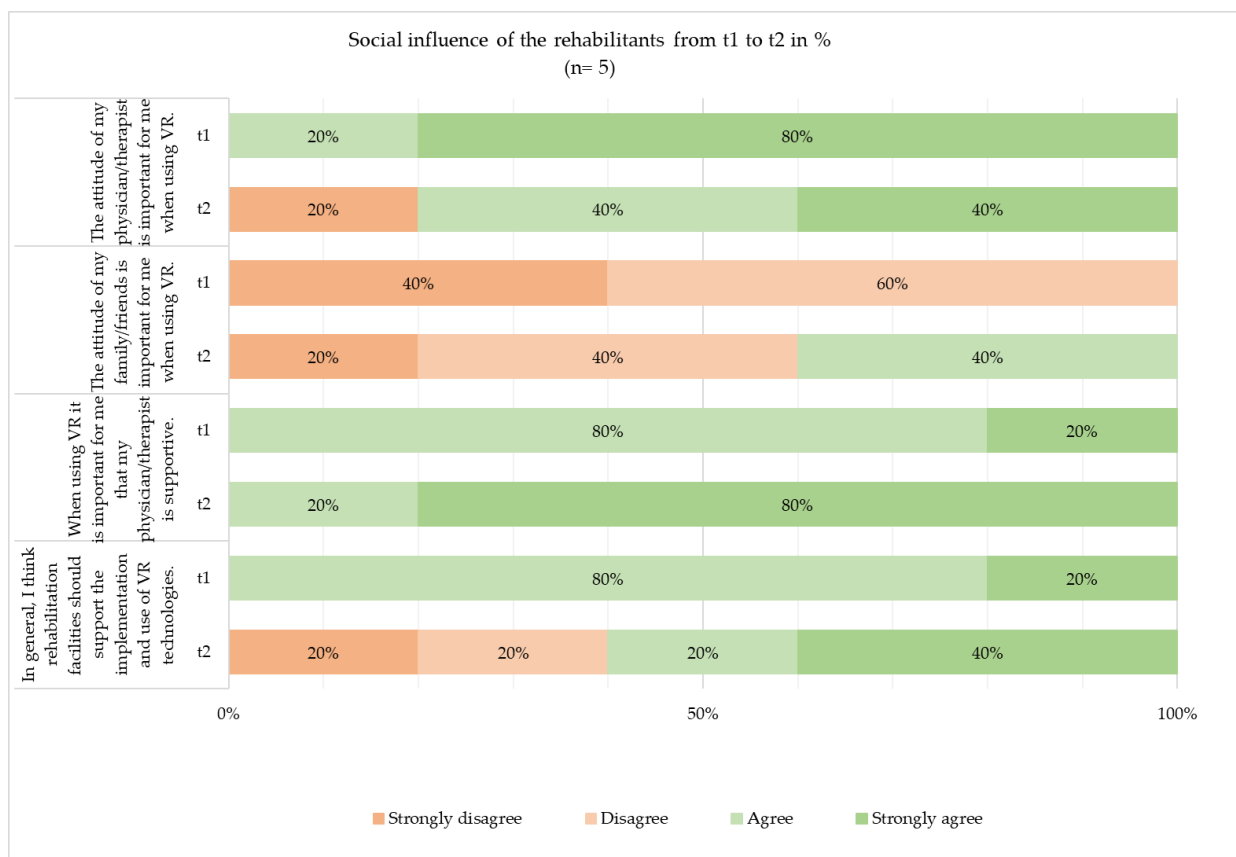

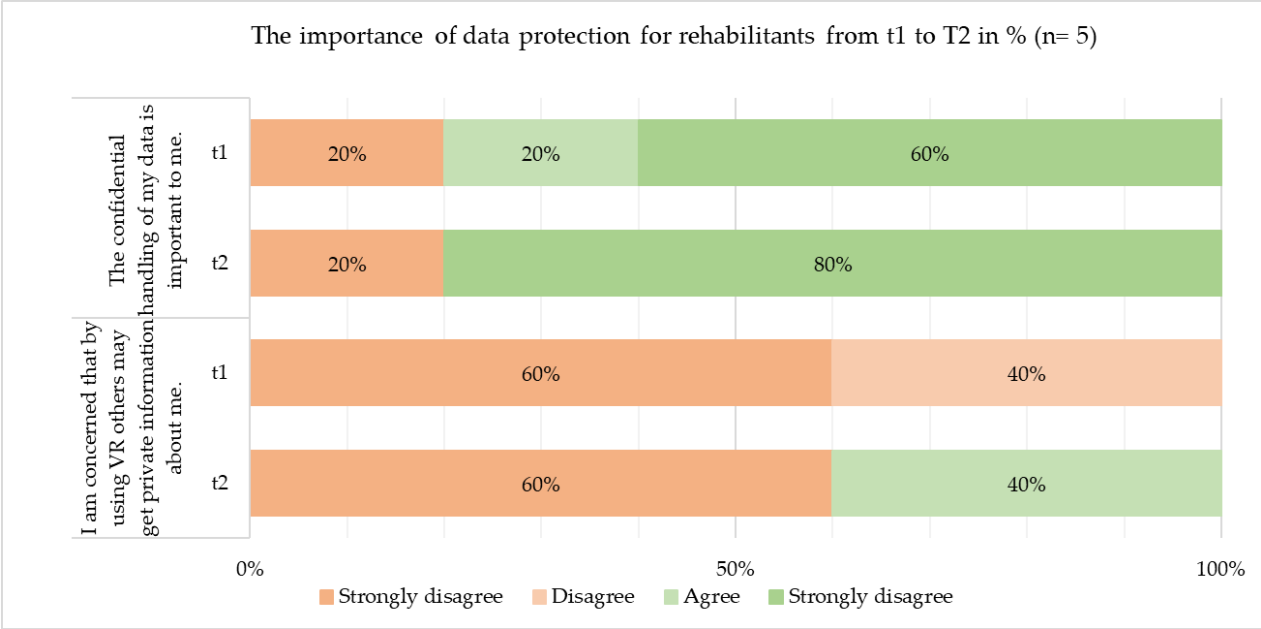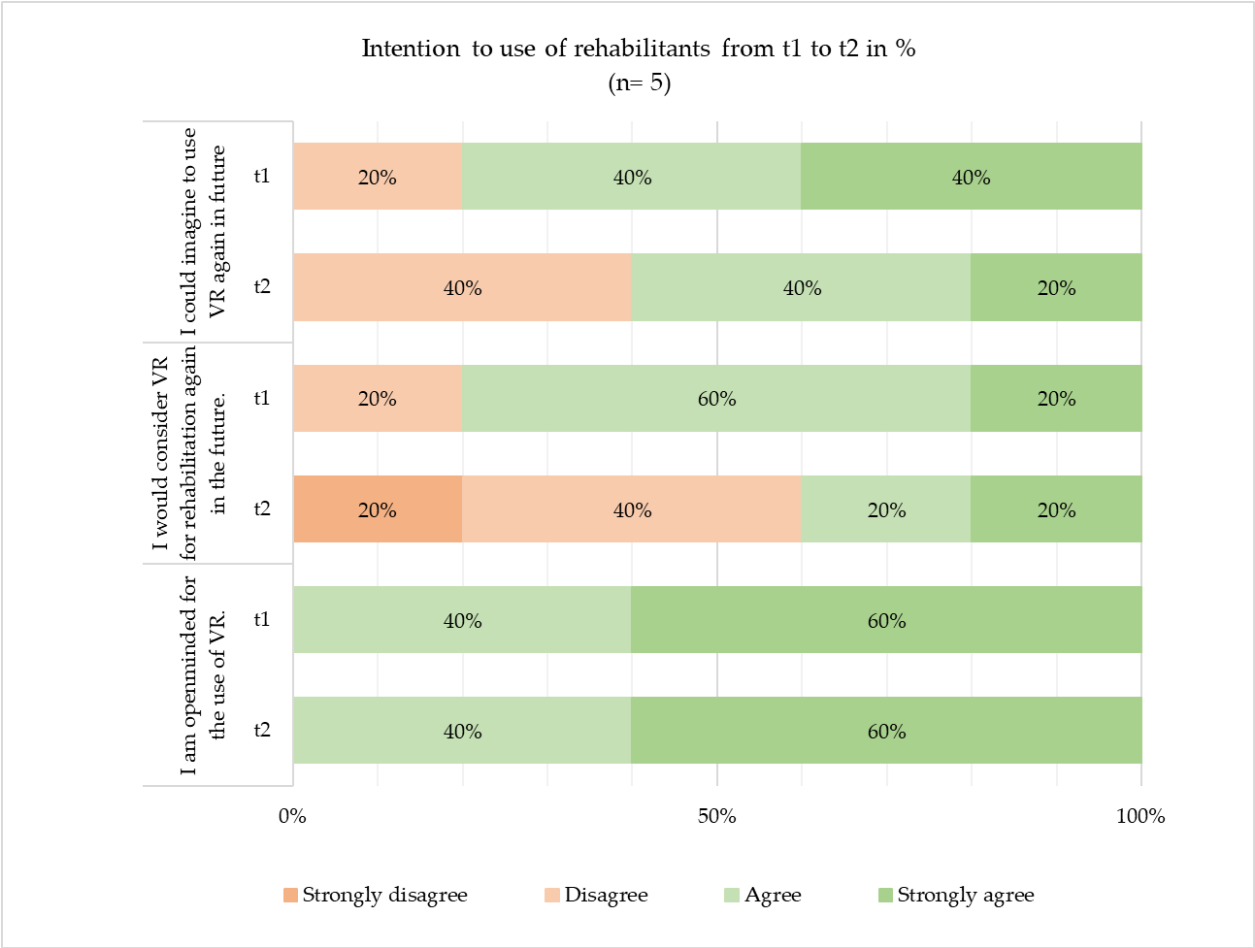

Supplement: s1 [file s1]
